# Supplementary material
Source: Springer Nature journal article supplement (https://www.springermedizin.de/resource/supplementary/12943_2013_1237_MOESM3_ESM.pdf/9552808)
Supplement: MOESM3 [file 9552808]

## Supplement Figure S2)

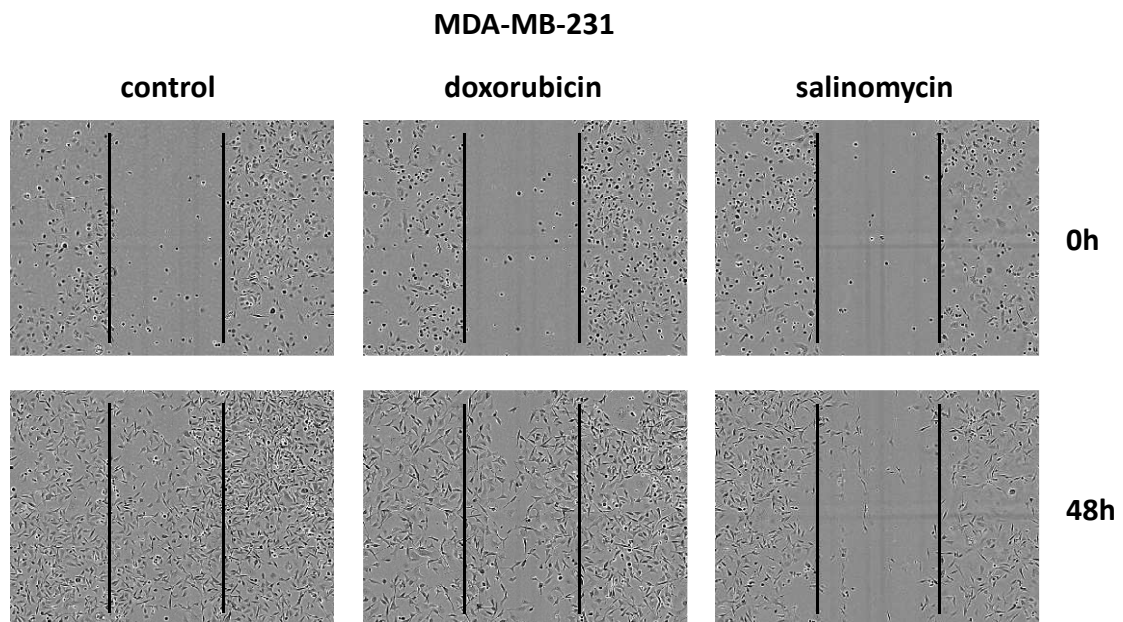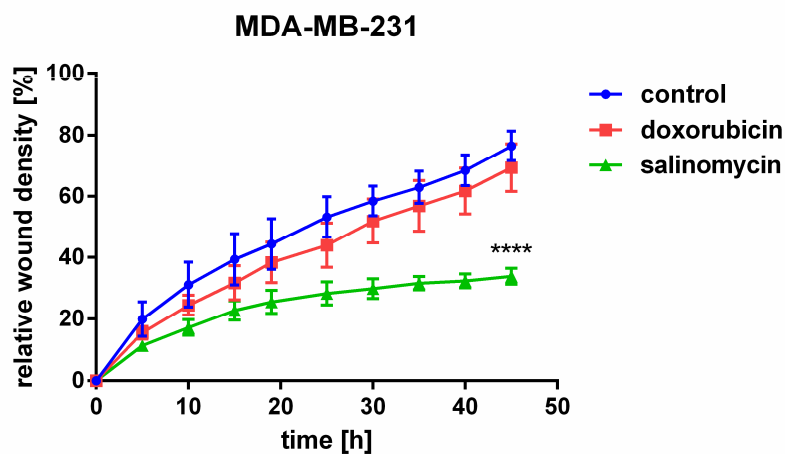

Wound healing assay of MDA-MB-231 cells. Cells were treated either with mock (control), doxorubicin (0.05 $\mu$ M) or salinomycin (0.10 $\mu$ M) and monitored for 48h using the IncuCyte ZOOM 40008 instrument (ESSEN BioScience) (upper panel). The relative wound density was analyzed using the IncuCyte ZOOM 2013A software (lower panel). (Values are stated as mean  $\pm$  SEM, student's t-test, two-tailed, \*\*\*\*p < 0.0001)
